# Supplementary material
Source: PubMed Central journal article supplement (PMC3422527)
Supplement: supp_112.195586_jpet_195586_suppl_figures.pdf [file supp_112.195586_jpet_195586_suppl_figures.pdf]

Bioenergetic Effects of Mitochondrial Targeted Coenzyme Q Analogs in Endothelial Cells\*

*Brian D. Fink<sup>1</sup>, Judith A. Herlein<sup>1</sup>, Mark A. Yorek<sup>1</sup>, Amanda M. Fenner<sup>2</sup>, Robert J. Kerns<sup>2</sup>, and William I Sivitz<sup>1</sup>*

The Journal of Pharmacology and Experimental Therapeutics

From the Departments of Internal Medicine/Endocrinology<sup>1</sup> and Pharmaceutical Sciences & Experimental Therapeutics<sup>2</sup>, University of Iowa and the Iowa City Veterans Affairs Medical Center, Iowa City, IA, 52242

\* Running title: Bioenergetics and CoQ analogs

To whom correspondence should be addressed: William I Sivitz, Department of Internal Medicine, Division of Endocrinology and Metabolism, The University of Iowa, 422GH, 200 Hawkins Drive, Iowa City, IA. 52242, USA, Tel: (319) 353-7812; Fax: (319) 353-7850 ; E-mail: [william-sivitz@uiowa.edu](mailto:william-sivitz@uiowa.edu)

SUPPLEMENTAL DATA

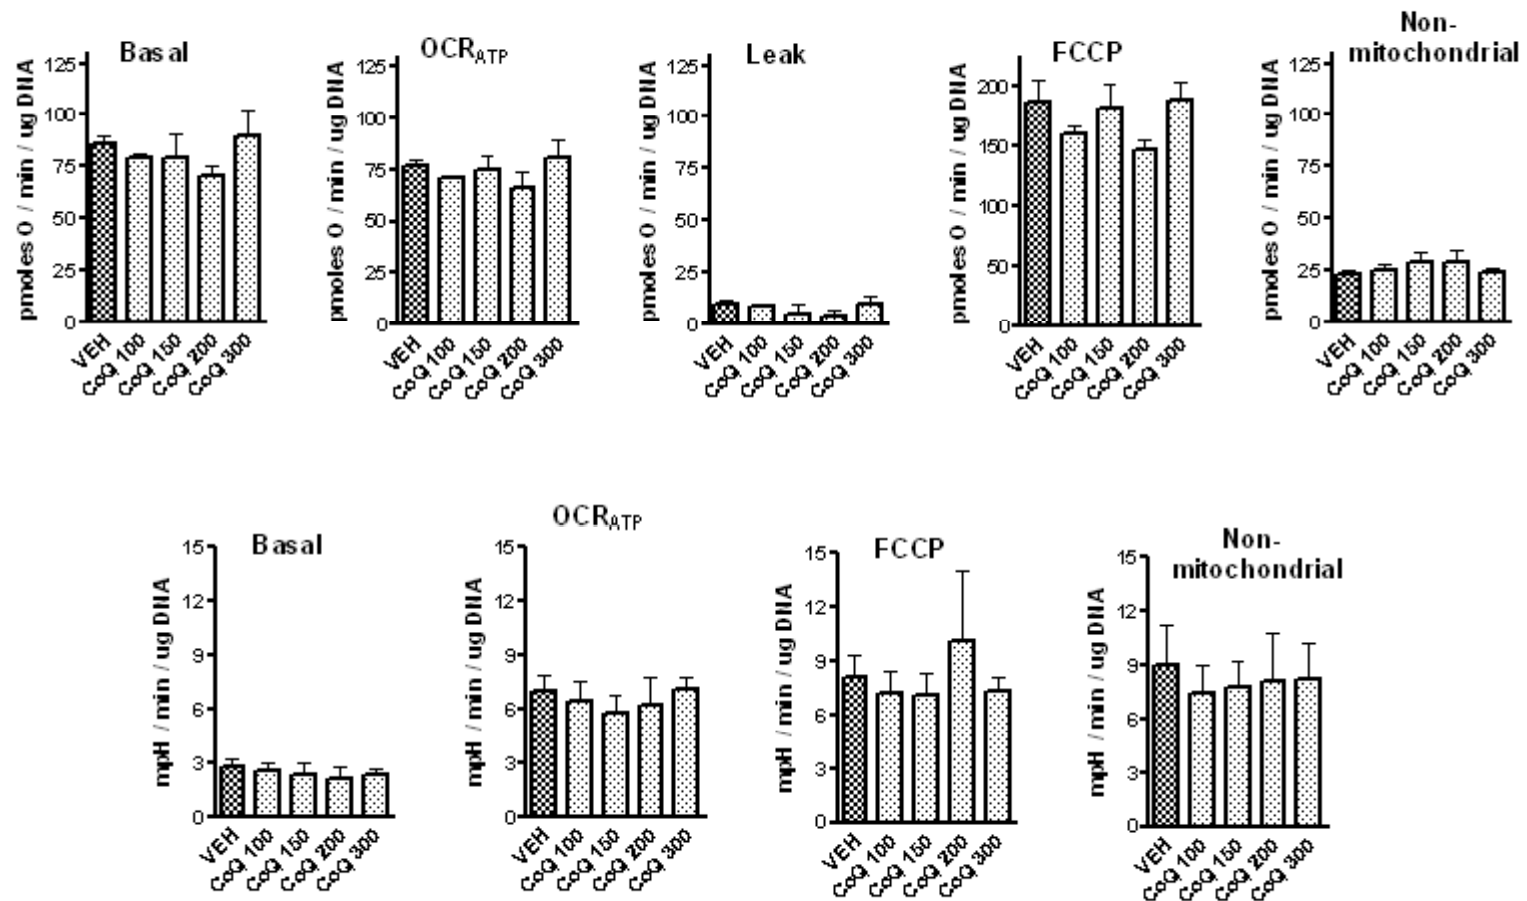

Supplemental figure 1. Lack of effect of Coenzyme Q10 on OCR (pmoles O/min/ $\mu$ g DNA, top row of panels) and ECAR (mpH/min/ $\mu$ g DNA, bottom row of panels) under conditions corresponding to figure 1 (main manuscript). CoQ = Coenzyme Q10, adjacent numbers indicate concentrations (nM). CoQ had no significant effects compared to vehicle for any of the conditions examined. Data represent mean  $\pm$  SEM, n = 4-5 wells per data point.

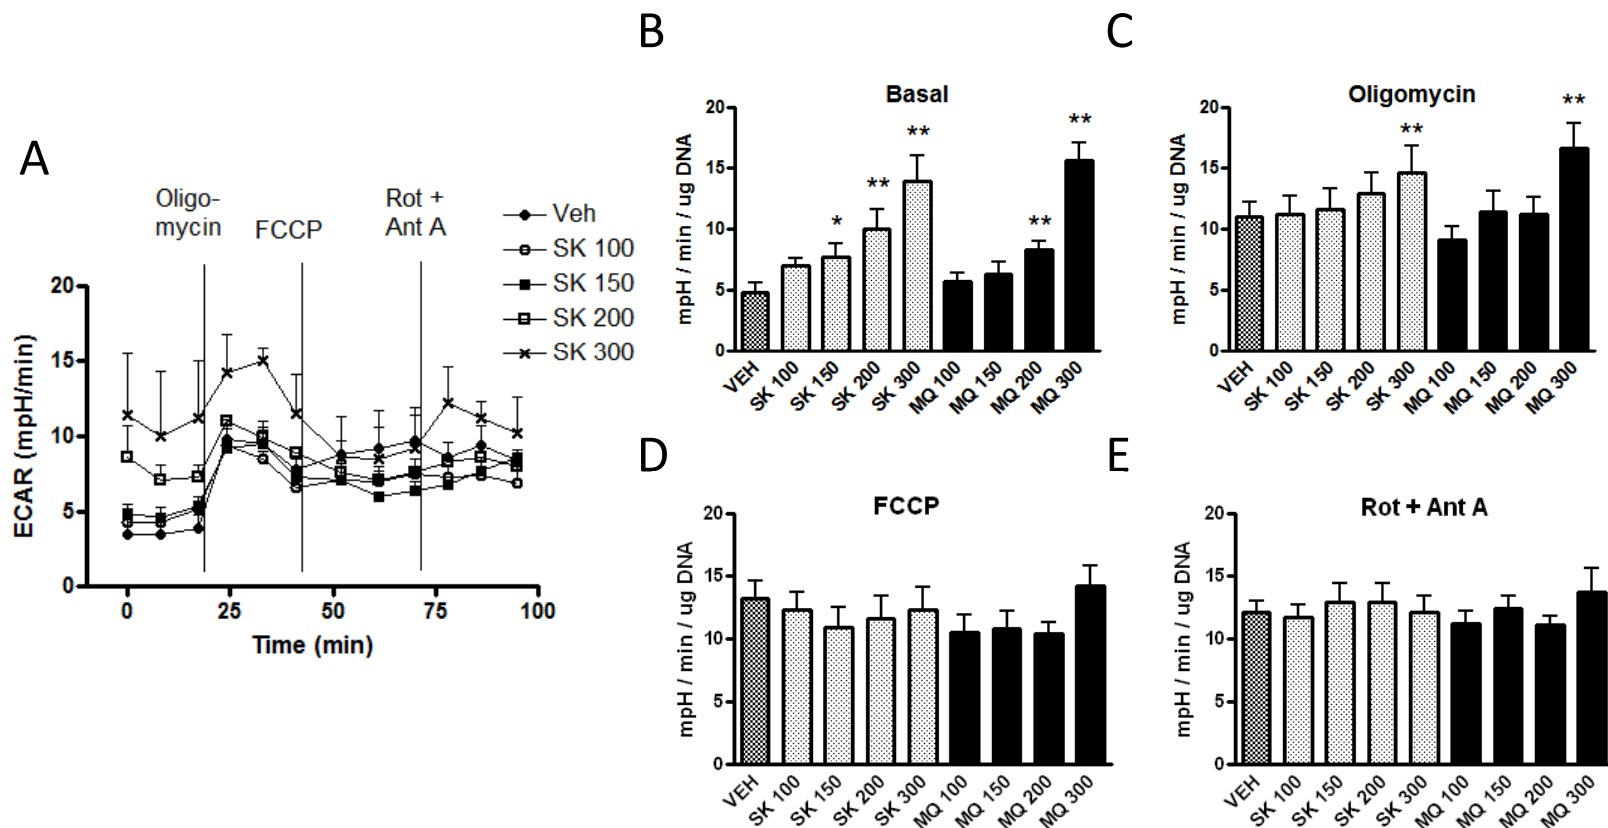

Supplemental figure 2. Effect of Mito Q and SkQ1 on ECAR measured in the experiments depicted in figure 1 (main manuscript). SK = SKQ1, MQ = MitoQ. Numbers adjacent to these designations indicate concentrations (nM). A) Same experiment shown in figure 1A assessing ECAR rather than OCR. B) Basal ECAR measured prior to addition of oligomycin. C) ECAR after oligomycin inhibition of ATP synthase. D) ECAR following FCCP. E) ECAR after inhibition of electron transport. Data in panel B-E represent mean  $\pm$  SEM, \*  $p < 0.05$ , \*\*  $p < 0.01$  compared to vehicle by one-way ANOVA with repeated measures and Dunnett post tests. Each data point represents the average value obtained in 6 experiments carried out as in panel A ( $n = 6$  for each data point, each data point representing the mean obtained in 2-3 wells per condition).
